# Supplementary material for: Assessment of semi-permanent hair dyes in wash water from beauty salons by liquid chromatography-tandem mass spectrometry-selected reaction monitoring (LC-MS/MS-SRM)
Source: Royal Society of Chemistry journal article supplement (doi:10.1039/d0ay01395a), 2020-01-01
Supplement: d0ay01395a1.pdf [file d0ay01395a1.pdf]

## SUPPLEMENTARY MATERIAL

**Assessment of semi-permanent hair dyes in wash water from beauty salons by liquid chromatography-tandem mass spectrometry reaction monitoring (LC-MS/MS-SRM)**

**Jefferson Honorio Franco<sup>a</sup>, Bianca F. da Silva<sup>a</sup>, and Maria V. B. Zanoni <sup>\*a</sup>**

<sup>a</sup>Institute of Chemistry-State University “Julio de Mesquita Filho”-UNESP-Avenida Professor Francisco Degni, 55, Quitandinha, 14800-900, Araraquara-SP, Brazil;

\*Author to whom correspondence should be addressed; E-Mail: [miboldrin@gmail.com](mailto:miboldrin@gmail.com)

Tel.: +55-16-3301-9619; Fax: +55-16-3322-2308.

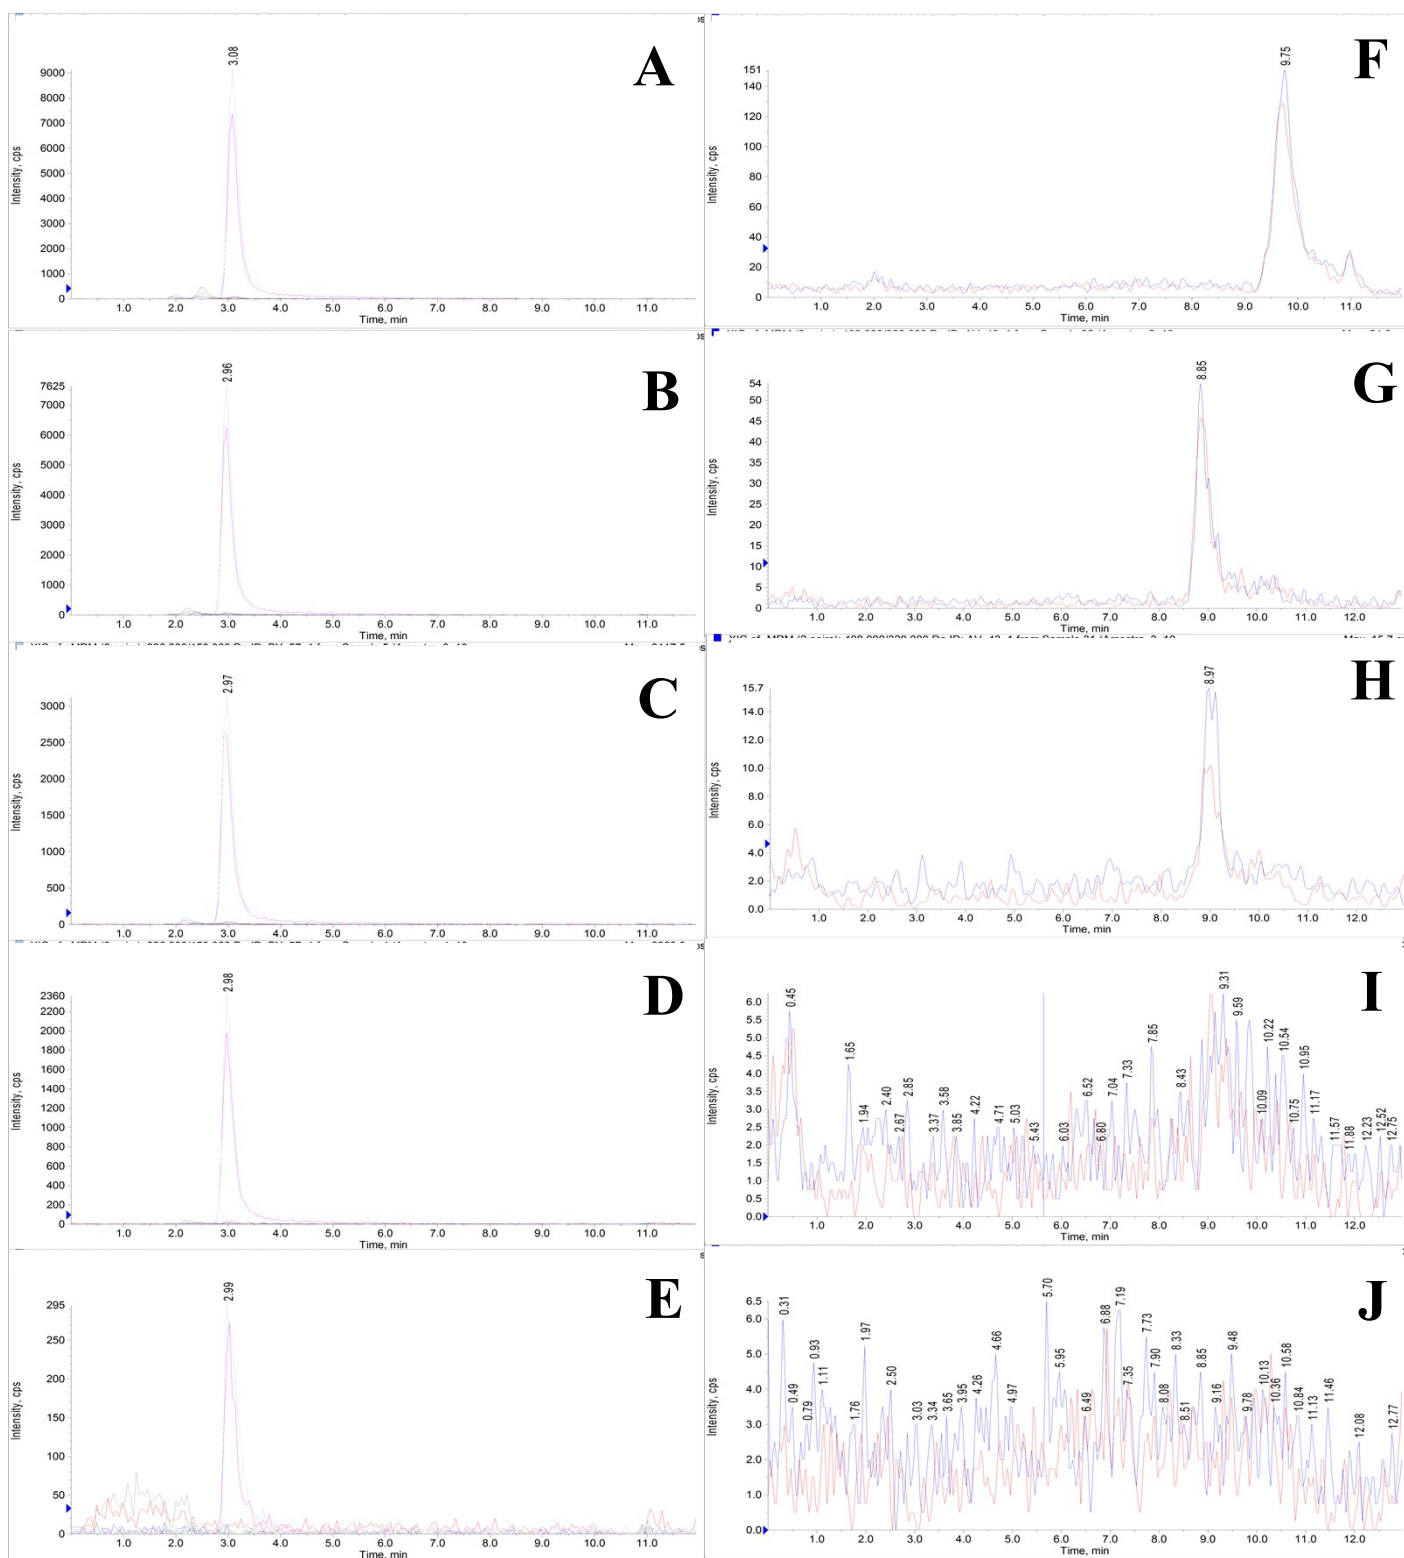

**Figure S1.** LC-MS/MS-SRM chromatograms obtained for the hair dyes in wash water. Positive mode: 1<sup>o</sup>, 2<sup>o</sup>, 3<sup>o</sup>, 4<sup>o</sup> and 5<sup>o</sup> washing day represented by A, B, C, D and E, respectively. Negative mode: 1<sup>o</sup>, 2<sup>o</sup>, 3<sup>o</sup>, 4<sup>o</sup> and 5<sup>o</sup> washing day represented by F, G, H, I, and J, respectively.
